# Supplementary material
Source: publisher site journal article supplement (https://www.spandidos-publications.com/465/downloadSupplementary)
Supplement: Supplementary file 1 [file downloadSupplementary]

## Sheet: SupplementaryTable1
Table SII
Sample	Interval	Group	IL-1beta	IL-1RA	IL-2	IL-2R	IL-4	IL-5	IL-6	IL-7	IL-8	IL-10	IL-12	IL-13	IL-15	IL-17	G-CSF	GM-CSF	GROa	IFN-alpha	IFN-gamma	TNF-alpha	eotaxin	IP-10	MCP-1	MIG	MIP-1alpha	MIP-1beta	RANTES	EGF	FGF-basic	HGF	VEGF
C1	Control	Control	28.8311	281.695	10.2616	310.342	11.5827	NA	2.38989	NA	8.16705	NA	169.043	NA	74.158	6.49505	93.3522	NA	3.73488	53.647	58.9841	3.15626	43.1144	36.4268	483.065	59.5222	56.4887	90.1598	3274.3	41.6099	40.2612	257.424	4.08501
C2	Control	Control	18.859	117.138	7.14666	253.961	10.6458	NA	0.9164	NA	9.84874	0.610207	158.407	8.5865	21.718	4.03609	106.326	NA	NA	57.6935	63.4096	3.15626	69.7131	46.1556	742.652	72.1569	44.4142	90.6077	2764.54	40.5925	29.3519	310.37	3.1475
C3	Control	Control	21.0676	252.731	7.84384	349.328	12.5197	NA	1.81531	NA	11.4767	NA	128.376	NA	35.8658	4.77277	108.884	NA	1.91921	58.3437	67.3429	3.76883	43.7002	25.0249	693.065	64.3839	46.5427	80.7139	2887.33	41.276	29.4302	640.065	4.39538
C4	Control	Control	27.1312	213.674	8.3071	336.547	29.589	2.42745	6.54898	NA	30.5268	NA	143.57	9.48597	66.3953	7.97377	118.871	NA	2.3382	64.1282	73.2414	5.04604	44.607	19.7322	645.286	56.1259	50.2671	86.1273	3428.42	50.4797	45.7588	412.928	17.0159
C5	Control	Control	19.304	179.213	7.37942	259.255	11.5827	NA	NA	NA	4.09051	0.961596	101.907	13.3995	15.1369	3.54577	118.966	NA	2.78618	56.3682	63.6555	2.5957	81.9274	20.0794	453.246	61.1554	44.379	57.6577	4383.44	61.0212	30.7106	336.764	1.99389
1	BASELINE	MELANOMA	37.1232	585.151	8.99949	215.771	18.9253	NA	5.34945	NA	54.1651	1.31231	182.761	4.73724	66.3953	1.83756	93.3522	0.295239	1.91921	56.9831	58.7382	4.39995	51.6972	25.3523	476.492	61.1554	46.9722	101.691	2819.47	78.2571	43.5946	845.265	8.53811
2	BASELINE	MELANOMA	20.1892	195.52	6.44739	300.445	10.1716	NA	13.9874	NA	19.6073	1.13695	119.913	2.56609	70.2682	3.54577	93.3522	NA	NA	53.6089	66.3595	3.45742	82.621	49.0253	693.314	118.362	46.9563	75.2575	2409.62	56.8229	26.8284	521.892	10.3091
3	BASELINE	MELANOMA	20.1824	461.295	7.37942	269.726	10.1716	NA	0.718945	NA	4.47726	0.610207	144.935	2.50679	39.6035	5.01814	88.1044	NA	3.34629	50.8081	60.7052	2.8551	85.4803	33.1559	682.18	65.8396	46.9722	65.1354	2781.14	110.268	29.4302	865.54	4.39538
4	BASELINE	MELANOMA	17.5272	275.606	6.68065	339.753	8.73891	NA	2.61687	NA	6.65624	NA	161.736	3.68385	28.5714	9.94309	103.742	NA	1.4377	50.8392	50.1333	2.56675	50.0235	16.022	540.6	49.1236	40.8841	98.5992	2630.85	110.046	28.1497	669.507	3.98078
5	BASELINE	MELANOMA	22.8173	365.751	7.37887	313.741	8.71263	NA	6.48223	NA	32.1321	NA	191.096	4.21054	35.8658	2.56872	93.3522	NA	NA	49.4094	52.5917	3.46768	76.2357	19.3496	577.424	156.735	41.7858	69.2917	2309.32	44.5947	35.6136	625.191	12.0877
6	BASELINE	MELANOMA	16.6298	461.248	6.79733	315.393	8.71263	NA	2.88191	NA	11.0653	NA	122.052	14.5251	41.4975	13.8587	77.3863	NA	2.70136	47.9693	60.951	2.56675	86.7031	34.9972	483.065	78.0963	45.2739	75.2525	2566.04	53.0863	28.1497	579.929	4.3874
7	BASELINE	MELANOMA	18.4188	309.453	6.9139	307.068	11.5827	NA	2.94692	NA	17.8238	NA	138.076	NA	35.8658	1.5938	103.742	NA	7.64447	53.647	62.9179	2.70914	63.9977	21.863	566.55	56.1259	41.7662	57.1996	2296	93.4624	28.1497	610.212	9.42327
8	BASELINE	MELANOMA	19.304	186.246	7.37942	336.525	10.6293	NA	1.00053	NA	10.4175	NA	94.5799	1.94791	41.463	4.52782	106.326	NA	2.28806	55.0076	71.7667	2.8551	44.1274	20.9711	259.818	59.5222	40.8841	66.0616	3772.17	75.6927	30.7106	417.142	3.40856
9	BASELINE	MELANOMA	24.5529	287.75	7.14666	395.821	10.1716	NA	4.50382	NA	79.0126	0.610207	143.559	2.82674	25.0526	5.50987	111.367	NA	NA	59.0188	69.3093	3.61198	27.6436	39.0801	394.316	72.1569	46.5507	66.9851	2814.74	33.7462	35.5818	5711.93	4.4974
10	BASELINE	MELANOMA	25.4171	204.661	7.84384	278.381	16.6554	NA	2.10236	14.7842	23.2294	1.4889	63.1413	4.73724	78.0558	10.9255	103.742	NA	1.84368	55.6924	62.6721	4.39995	47.6573	16.7832	443.02	41.6334	47.8034	215.657	2837.08	87.4618	40.8244	421.266	7.90027
11	BASELINE	MELANOMA	17.515	365.552	5.97968	297.07	15.7424	NA	1.18641	NA	7.05455	NA	205.728	NA	19.9396	NA	93.3522	NA	2.3382	56.3329	53.575	3.76883	41.737	49.7358	327.693	132.271	46.1252	92.392	2753.74	32.4533	28.1497	509.868	5.21966
12	BASELINE	MELANOMA	27.1241	311.232	6.68065	262.745	17.5682	NA	4.1922	NA	23.5876	NA	121.341	NA	74.166	12.8835	93.3522	NA	2.4023	50.8495	65.3763	3.15626	44.9844	45.3946	339.077	94.7601	47.8034	75.2424	2829.49	66.2177	40.2338	553.072	9.48111
1	1MONTH	MELANOMA	45.0947	1130.65	9.22986	200.672	20.7265	2.42745	8.08273	NA	61.9625	2.75437	303.274	7.65325	89.7511	1.5938	103.535	0.582165	3.30957	130.02	59.7217	5.70431	75.5901	216.631	1115.32	92.0681	51.8718	104.764	2655.23	63.8485	48.9031	748.514	13.178
2	1MONTH	MELANOMA	18.859	213.674	6.44696	293.72	9.69234	NA	6.80299	NA	20.6363	NA	74.123	NA	93.6452	4.03609	98.6	NA	NA	52.9331	65.868	3.15626	78.1978	27.4189	636.602	52.5199	47.3897	71.5949	2510.73	55.7916	24.83	525.786	11.0344
3	1MONTH	MELANOMA	22.8173	321.077	6.9139	290.345	10.6458	NA	NA	NA	2.26151	0.610207	139.458	NA	35.9563	5.01814	98.494	NA	3.42122	49.3228	61.9345	3.76883	78.0308	42.2274	633.719	69.068	47.8034	71.1282	2649.42	100.762	31.9536	800.831	3.35323
4	1MONTH	MELANOMA	19.304	235.635	6.44739	288.585	7.7592	NA	2.26516	NA	3.47819	NA	192.409	1.94791	28.5714	7.97377	103.535	NA	NA	53.647	48.6585	2.42079	62.7805	18.6834	612.473	49.1236	38.1133	92.315	2704.79	90.4085	28.1497	525.601	3.97819
5	1MONTH	MELANOMA	20.1892	297.705	6.21371	286.942	7.7592	NA	7.50469	NA	27.9585	NA	162.415	2.82674	21.5794	2.08126	88.1044	NA	NA	47.9693	51.6082	2.8551	71.3698	18.0376	583.322	116.133	43.5502	60.4791	2288.54	31.9015	30.7106	545.33	9.6237
6	1MONTH	MELANOMA	17.0822	363.946	7.03034	293.72	10.6458	NA	5.16292	NA	6.18525	NA	112.81	10.7975	43.4046	14.1023	93.3522	NA	2.27233	50.8495	61.9345	2.8551	69.9414	37.8817	549.671	80.9621	43.5502	63.2746	2623.6	43.6074	33.1621	572.303	4.39457
7	1MONTH	MELANOMA	19.304	252.731	6.44739	323.565	9.69234	NA	4.91521	NA	16.8051	NA	134.636	NA	34.0288	2.08126	103.742	NA	3.19394	57.0351	59.9676	2.8551	56.174	25.4815	518.564	62.7507	45.2782	55.7767	2514.21	82.3084	28.1497	533.649	11.4673
8	1MONTH	MELANOMA	21.5041	229.163	7.14666	339.753	11.5827	NA	1.75133	NA	13.5362	NA	98.275	1.58143	43.3412	4.03609	98.494	NA	1.26538	55.0076	70.2924	2.56675	46.1035	33.113	276.314	84.9572	39.015	70.2152	3394.46	70.9576	33.1966	462.102	5.06599
9	1MONTH	MELANOMA	24.5529	365.552	7.37942	416.764	10.6458	NA	8.79043	NA	81.4119	0.610207	159.76	2.56609	34.0288	5.51073	103.742	NA	NA	60.3114	67.5887	3.30541	28.3289	35.7849	439.642	83.7362	45.2612	82.5231	2741.35	38.363	36.7903	2809.95	6.08725
10	1MONTH	MELANOMA	37.1216	213.674	7.37942	280.108	13.445	NA	3.02715	NA	13.9494	NA	67.8861	4.21054	47.1423	9.94309	103.742	NA	1.91921	53.6089	63.6554	3.45742	44.3936	19.8809	383.529	49.1236	46.1252	212.076	3130.75	95.2129	50.9773	454.044	8.74273
11	1MONTH	MELANOMA	20.1824	347.46	5.51197	261.004	17.1127	NA	1.56916	NA	4.24512	NA	243.524	2.56609	28.6998	1.34887	95.9897	NA	NA	57.6935	59.4758	3.15626	37.3612	32.2431	329.684	131.165	45.2612	74.3444	2703.43	29.4459	28.1089	454.044	3.66853
12	1MONTH	MELANOMA	24.5529	283.587	6.9139	266.266	18.016	NA	6.6109	NA	29.5509	NA	137.4	3.12497	66.3953	12.394	98.6	NA	1.91921	49.4094	61.4428	3.15626	39.7943	59.4815	424.198	131.165	49.4508	78.9	2787.53	41.276	40.2338	490.279	9.18575
1	3MONTHS	MELANOMA	33.8402	526.742	8.19136	189.133	11.5827	NA	3.46602	NA	33.92	0.873981	178.214	4.21054	58.6325	1.58648	98.6	NA	4.54774	126.151	59.9676	2.8551	81.651	111.647	785.196	86.602	43.5502	86.1273	3118.76	76.2066	38.5441	560.785	8.54568
2	3MONTHS	MELANOMA	21.9459	321.077	7.37887	326.793	11.5827	NA	10.411	NA	95.3379	0.961596	105.585	NA	89.7511	3.54577	103.535	NA	2.96168	194.724	66.8513	4.08025	124.794	181.102	1581.3	89.3761	46.9087	80.7139	2222.7	51.5564	26.8284	412.928	11.6589
3	3MONTHS	MELANOMA	22.8173	385.364	7.61163	286.886	7.7592	NA	NA	NA	NA	0.698287	131.165	NA	32.2186	5.50987	88.1044	NA	2.96168	48.6947	58.4923	3.15626	74.0818	38.6758	663.863	65.8396	49.4508	64.2064	2388.19	110.488	30.6732	716.531	3.61326
4	3MONTHS	MELANOMA	17.5272	202.4	6.9134	323.589	6.7795	NA	NA	NA	7.84322	NA	146.295	1.94791	18.1992	7.48092	103.742	NA	NA	53.647	51.8541	2.56675	58.6872	17.2445	531.149	56.1259	41.7858	99.4871	2646.57	64.1355	28.1497	470.227	1.25896
5	3MONTHS	MELANOMA	24.5529	311.314	7.03009	308.746	7.7592	NA	8.08426	NA	17.9017	NA	147.649	4.21054	43.3412	3.54577	98.494	NA	NA	47.9241	53.0832	3.45742	75.8925	23.3895	548.364	117.316	43.1022	70.2165	2217.94	38.0188	33.1966	517.983	12.0409
6	3MONTHS	MELANOMA	23.6887	852.738	7.61163	321.942	10.6458	NA	2.99715	NA	25.5889	NA	245.379	16.2974	47.1423	13.8587	103.742	NA	7.62114	168.393	59.9676	2.56675	118.752	107.567	1102.8	65.9791	43.532	66.0616	2386.51	45.8956	30.7106	425.407	7.59689
7	3MONTHS	MELANOMA	19.7474	226.92	7.14666	355.635	12.0466	NA	2.21876	NA	23.0583	NA	191.065	NA	35.8658	2.56979	98.6	NA	5.32951	61.5735	63.4096	2.56675	68.289	55.9871	543.654	49.1236	44.4142	43.4148	3756.18	129.746	30.7106	421.266	10.2546
8	3MONTHS	MELANOMA	21.0676	222.563	6.68065	326.84	10.6458	NA	3.14825	NA	17.3074	NA	60.7648	NA	43.3412	5.01814	82.7454	NA	NA	55.0076	70.7839	2.2784	48.0873	33.4908	264.007	76.6253	38.1133	100.369	3414.54	49.7027	29.4302	510.057	6.39121
9	3MONTHS	MELANOMA	19.304	215.827	7.03034	259.191	13.445	NA	1.57685	NA	13.5647	0.610207	59.9548	3.68385	28.5714	8.95784	98.6	NA	2.90436	52.9331	59.4758	2.86791	69.819	22.0819	564.453	41.6334	46.9563	221.983	3477.25	81.7253	33.1621	404.663	6.94298
10	3MONTHS	MELANOMA	23.6815	233.491	7.72781	290.345	20.7265	NA	2.26822	NA	22.884	1.31231	74.123	5.24159	70.2682	9.94309	108.884	NA	2.84589	56.3682	61.9345	4.39995	43.1409	17.0178	574.412	45.5175	47.8034	212.074	2725.58	100.644	29.4302	502.193	7.49772
11	3MONTHS	MELANOMA	21.0676	293.747	7.61163	302.123	21.6196	NA	1.99435	NA	7.52375	NA	258.052	3.12497	32.2186	4.03609	113.925	NA	2.12969	60.3114	61.9345	4.39995	60.3333	45.8893	390.721	135.608	49.422	105.639	3123.96	37.1452	33.1966	486.275	4.70386
12	3MONTHS	MELANOMA	25.41	271.511	6.9139	255.604	18.016	NA	6.86715	NA	28.9302	NA	136.706	3.12497	70.2682	11.4162	98.6	NA	1.4377	49.4094	63.6555	3.45742	42.2636	60.5455	446.442	133.407	45.2782	79.8082	2527.74	41.9504	40.2612	517.983	8.49607
